# Supplementary material
Source: publisher figshare collection journal article supplement (https://acs.figshare.com/ndownloader/files/4446358)
Supplement: Supplementary file 1 [file 4446358]

 
data_d:\wrh\lxj\lxj610\a 
 
_audit_creation_method            SHELXL-97 
_chemical_name_systematic 
; 
 ? 
; 
_chemical_name_common             ? 
_chemical_melting_point           ? 
_chemical_formula_moiety          ? 
_chemical_formula_sum 
 'C9 H9 Co0.50 N2 O2' 
_chemical_formula_weight          206.65 
 
loop_ 
 _atom_type_symbol 
 _atom_type_description 
 _atom_type_scat_dispersion_real 
 _atom_type_scat_dispersion_imag 
 _atom_type_scat_source 
 'C'  'C'   0.0033   0.0016 
 'International Tables Vol C Tables 4.2.6.8 and 6.1.1.4' 
 'Co'  'Co'   0.3494   0.9721 
 'International Tables Vol C Tables 4.2.6.8 and 6.1.1.4' 
 'N'  'N'   0.0061   0.0033 
 'International Tables Vol C Tables 4.2.6.8 and 6.1.1.4' 
 'O'  'O'   0.0106   0.0060 
 'International Tables Vol C Tables 4.2.6.8 and 6.1.1.4' 
 'H'  'H'   0.0000   0.0000 
 'International Tables Vol C Tables 4.2.6.8 and 6.1.1.4' 
 
_symmetry_cell_setting            Monoclinic 
_symmetry_space_group_name_H-M    P2/c 
 
loop_ 
 _symmetry_equiv_pos_as_xyz 
 'x, y, z' 
 '-x, y, -z+1/2' 
 '-x, -y, -z' 
 'x, -y, z-1/2' 
 
_cell_length_a                    8.1653(8) 
_cell_length_b                    7.7354(5) 
_cell_length_c                    15.2305(11) 
_cell_angle_alpha                 90.00 
_cell_angle_beta                  109.283(5) 
_cell_angle_gamma                 90.00 
_cell_volume                      908.02(13) 
_cell_formula_units_Z             4 
_cell_measurement_temperature     173(2) 
_cell_measurement_reflns_used     ? 
_cell_measurement_theta_min       ? 
_cell_measurement_theta_max       ? 
 
_exptl_crystal_description        ? 
_exptl_crystal_colour             ? 
_exptl_crystal_size_max           0.38 
_exptl_crystal_size_mid           0.30 
_exptl_crystal_size_min           0.23 
_exptl_crystal_density_meas       ? 
_exptl_crystal_density_diffrn     1.512 
_exptl_crystal_density_method     'not measured' 
_exptl_crystal_F_000              426 
_exptl_absorpt_coefficient_mu     0.977 
_exptl_absorpt_correction_type    multi-scan 
_exptl_absorpt_correction_T_min   0.7077 
_exptl_absorpt_correction_T_max   0.8065 
_exptl_absorpt_process_details    ? 
 
_exptl_special_details 
; 
 ? 
; 
 
_diffrn_ambient_temperature       173(2) 
_diffrn_radiation_wavelength      0.71073 
_diffrn_radiation_type            MoK\a 
_diffrn_radiation_source          'fine-focus sealed tube' 
_diffrn_radiation_monochromator   graphite 
_diffrn_measurement_device_type   ? 
_diffrn_measurement_method        ? 
_diffrn_detector_area_resol_mean  ? 
_diffrn_standards_number          ? 
_diffrn_standards_interval_count  ? 
_diffrn_standards_interval_time   ? 
_diffrn_standards_decay_%         ? 
_diffrn_reflns_number             6706 
_diffrn_reflns_av_R_equivalents   0.0191 
_diffrn_reflns_av_sigmaI/netI     0.0189 
_diffrn_reflns_limit_h_min        -10 
_diffrn_reflns_limit_h_max        10 
_diffrn_reflns_limit_k_min        -7 
_diffrn_reflns_limit_k_max        10 
_diffrn_reflns_limit_l_min        -19 
_diffrn_reflns_limit_l_max        19 
_diffrn_reflns_theta_min          2.63 
_diffrn_reflns_theta_max          27.48 
_reflns_number_total              2080 
_reflns_number_gt                 1929 
_reflns_threshold_expression      >2sigma(I) 
 
_computing_data_collection        ? 
_computing_cell_refinement        ? 
_computing_data_reduction         ? 
_computing_structure_solution     'SHELXS-97 (Sheldrick, 1990)' 
_computing_structure_refinement   'SHELXL-97 (Sheldrick, 1997)' 
_computing_molecular_graphics     ? 
_computing_publication_material   ? 
 
_refine_special_details 
; 
 Refinement of F^2^ against ALL reflections.  The weighted R-factor wR and 
 goodness of fit S are based on F^2^, conventional R-factors R are based 
 on F, with F set to zero for negative F^2^. The threshold expression of 
 F^2^ > 2sigma(F^2^) is used only for calculating R-factors(gt) etc. and is 
 not relevant to the choice of reflections for refinement.  R-factors based 
 on F^2^ are statistically about twice as large as those based on F, and R- 
 factors based on ALL data will be even larger. 
; 
 
_refine_ls_structure_factor_coef  Fsqd  
_refine_ls_matrix_type            full 
_refine_ls_weighting_scheme       calc  
_refine_ls_weighting_details 
 'calc w=1/[\s^2^(Fo^2^)+(0.0456P)^2^+0.6509P] where P=(Fo^2^+2Fc^2^)/3' 
_atom_sites_solution_primary      direct 
_atom_sites_solution_secondary    difmap 
_atom_sites_solution_hydrogens    geom 
_refine_ls_hydrogen_treatment     constr 
_refine_ls_extinction_method      none 
_refine_ls_extinction_coef        ? 
_refine_ls_number_reflns          2080 
_refine_ls_number_parameters      123 
_refine_ls_number_restraints      0 
_refine_ls_R_factor_all           0.0405 
_refine_ls_R_factor_gt            0.0371 
_refine_ls_wR_factor_ref          0.0987 
_refine_ls_wR_factor_gt           0.0963 
_refine_ls_goodness_of_fit_ref    1.087 
_refine_ls_restrained_S_all       1.087 
_refine_ls_shift/su_max           0.000 
_refine_ls_shift/su_mean          0.000 
 
loop_ 
 _atom_site_label 
 _atom_site_type_symbol 
 _atom_site_fract_x 
 _atom_site_fract_y 
 _atom_site_fract_z 
 _atom_site_U_iso_or_equiv 
 _atom_site_adp_type 
 _atom_site_occupancy 
 _atom_site_symmetry_multiplicity 
 _atom_site_calc_flag 
 _atom_site_refinement_flags 
 _atom_site_disorder_assembly 
 _atom_site_disorder_group 
Co Co 0.0000 0.58657(5) 0.2500 0.02890(14) Uani 1 2 d S . . 
O1 O 0.2129(2) 0.7138(2) 0.31444(11) 0.0406(4) Uani 1 1 d . . . 
O2 O 0.1794(3) 0.8835(3) 0.19462(12) 0.0625(6) Uani 1 1 d . . . 
N1 N 0.0328(2) 0.4263(2) 0.36029(12) 0.0335(4) Uani 1 1 d . . . 
N2 N 0.0073(3) 0.2247(2) 0.45667(12) 0.0379(4) Uani 1 1 d . . . 
C1 C 0.2590(3) 0.8375(3) 0.27350(14) 0.0328(4) Uani 1 1 d . . . 
C3 C 0.4714(3) 1.0866(3) 0.28876(17) 0.0377(5) Uani 1 1 d . . . 
C2 C 0.4306(3) 0.9222(3) 0.32977(17) 0.0441(6) Uani 1 1 d . . . 
H2A H 0.4280 0.9472 0.3930 0.053 Uiso 1 1 calc R . . 
H2B H 0.5257 0.8387 0.3361 0.053 Uiso 1 1 calc R . . 
C8 C -0.0627(3) 0.0762(3) 0.49290(17) 0.0389(5) Uani 1 1 d . . . 
H8A H -0.1774 0.0437 0.4484 0.047 Uiso 1 1 calc R . . 
H8B H -0.0780 0.1072 0.5528 0.047 Uiso 1 1 calc R . . 
C9 C -0.0557(3) 0.2890(3) 0.37005(15) 0.0400(5) Uani 1 1 d . . . 
H9A H -0.1515 0.2418 0.3220 0.048 Uiso 1 1 calc R . . 
C6 C 0.1577(3) 0.4497(3) 0.44613(15) 0.0363(5) Uani 1 1 d . . . 
H6A H 0.2407 0.5406 0.4613 0.044 Uiso 1 1 calc R . . 
C4 C 0.4474(3) 1.2437(4) 0.3272(3) 0.0621(8) Uani 1 1 d . . . 
H4A H 0.4119 1.2446 0.3807 0.075 Uiso 1 1 calc R . . 
C5 C 0.4746(4) 1.3986(4) 0.2887(4) 0.0925(17) Uani 1 1 d . . . 
H5A H 0.4582 1.5050 0.3158 0.111 Uiso 1 1 calc R . . 
C7 C 0.1451(3) 0.3256(3) 0.50505(16) 0.0398(5) Uani 1 1 d . . . 
H7A H 0.2174 0.3107 0.5678 0.048 Uiso 1 1 calc R . . 
 
loop_ 
 _atom_site_aniso_label 
 _atom_site_aniso_U_11 
 _atom_site_aniso_U_22 
 _atom_site_aniso_U_33 
 _atom_site_aniso_U_23 
 _atom_site_aniso_U_13 
 _atom_site_aniso_U_12 
Co 0.0365(2) 0.0243(2) 0.0260(2) 0.000 0.01034(16) 0.000 
O1 0.0382(8) 0.0353(8) 0.0459(9) 0.0083(7) 0.0107(7) -0.0055(7) 
O2 0.0539(11) 0.0800(15) 0.0388(9) 0.0177(9) -0.0048(8) -0.0303(10) 
N1 0.0404(10) 0.0298(9) 0.0282(9) 0.0036(7) 0.0086(7) -0.0027(7) 
N2 0.0494(11) 0.0283(9) 0.0328(9) 0.0048(7) 0.0094(8) -0.0012(8) 
C1 0.0329(10) 0.0309(11) 0.0333(10) -0.0001(9) 0.0092(8) -0.0032(8) 
C3 0.0240(10) 0.0296(11) 0.0553(14) -0.0072(10) 0.0077(9) -0.0043(8) 
C2 0.0365(12) 0.0494(15) 0.0395(12) 0.0029(10) 0.0033(10) -0.0123(10) 
C8 0.0481(13) 0.0325(12) 0.0369(11) 0.0027(9) 0.0154(10) -0.0011(10) 
C9 0.0507(13) 0.0328(11) 0.0308(10) 0.0030(9) 0.0058(9) -0.0058(10) 
C6 0.0381(11) 0.0360(11) 0.0320(10) 0.0025(9) 0.0078(9) -0.0025(9) 
C4 0.0343(13) 0.0538(17) 0.095(2) -0.0332(16) 0.0171(13) -0.0007(11) 
C5 0.0441(18) 0.0290(13) 0.186(6) -0.0279(19) 0.013(2) 0.0043(12) 
C7 0.0404(12) 0.0401(12) 0.0333(11) 0.0068(9) 0.0048(9) -0.0001(10) 
 
_geom_special_details 
; 
 All esds (except the esd in the dihedral angle between two l.s. planes) 
 are estimated using the full covariance matrix.  The cell esds are taken 
 into account individually in the estimation of esds in distances, angles 
 and torsion angles; correlations between esds in cell parameters are only 
 used when they are defined by crystal symmetry.  An approximate (isotropic) 
 treatment of cell esds is used for estimating esds involving l.s. planes. 
; 
 
loop_ 
 _geom_bond_atom_site_label_1 
 _geom_bond_atom_site_label_2 
 _geom_bond_distance 
 _geom_bond_site_symmetry_2 
 _geom_bond_publ_flag 
Co O1 1.9561(16) . ? 
Co O1 1.9561(16) 2 ? 
Co N1 2.0331(17) 2 ? 
Co N1 2.0331(17) . ? 
O1 C1 1.265(3) . ? 
O2 C1 1.215(3) . ? 
N1 C9 1.320(3) . ? 
N1 C6 1.379(3) . ? 
N2 C9 1.343(3) . ? 
N2 C7 1.367(3) . ? 
N2 C8 1.470(3) . ? 
C1 C2 1.528(3) . ? 
C3 C4 1.390(3) . ? 
C3 C3 1.405(5) 2_655 ? 
C3 C2 1.502(3) . ? 
C2 H2A 0.9900 . ? 
C2 H2B 0.9900 . ? 
C8 C8 1.529(5) 3_556 ? 
C8 H8A 0.9900 . ? 
C8 H8B 0.9900 . ? 
C9 H9A 0.9500 . ? 
C6 C7 1.341(3) . ? 
C6 H6A 0.9500 . ? 
C4 C5 1.384(5) . ? 
C4 H4A 0.9500 . ? 
C5 C5 1.372(10) 2_655 ? 
C5 H5A 0.9500 . ? 
C7 H7A 0.9500 . ? 
 
loop_ 
 _geom_angle_atom_site_label_1 
 _geom_angle_atom_site_label_2 
 _geom_angle_atom_site_label_3 
 _geom_angle 
 _geom_angle_site_symmetry_1 
 _geom_angle_site_symmetry_3 
 _geom_angle_publ_flag 
O1 Co O1 119.58(10) . 2 ? 
O1 Co N1 125.04(7) . 2 ? 
O1 Co N1 92.26(7) 2 2 ? 
O1 Co N1 92.26(7) . . ? 
O1 Co N1 125.04(7) 2 . ? 
N1 Co N1 104.85(10) 2 . ? 
C1 O1 Co 119.54(14) . . ? 
C9 N1 C6 105.07(18) . . ? 
C9 N1 Co 130.98(15) . . ? 
C6 N1 Co 123.89(15) . . ? 
C9 N2 C7 107.35(19) . . ? 
C9 N2 C8 126.0(2) . . ? 
C7 N2 C8 126.63(18) . . ? 
O2 C1 O1 124.0(2) . . ? 
O2 C1 C2 121.4(2) . . ? 
O1 C1 C2 114.52(18) . . ? 
C4 C3 C3 119.09(19) . 2_655 ? 
C4 C3 C2 118.9(3) . . ? 
C3 C3 C2 122.01(14) 2_655 . ? 
C3 C2 C1 114.72(19) . . ? 
C3 C2 H2A 108.6 . . ? 
C1 C2 H2A 108.6 . . ? 
C3 C2 H2B 108.6 . . ? 
C1 C2 H2B 108.6 . . ? 
H2A C2 H2B 107.6 . . ? 
N2 C8 C8 109.3(2) . 3_556 ? 
N2 C8 H8A 109.8 . . ? 
C8 C8 H8A 109.8 3_556 . ? 
N2 C8 H8B 109.8 . . ? 
C8 C8 H8B 109.8 3_556 . ? 
H8A C8 H8B 108.3 . . ? 
N1 C9 N2 111.2(2) . . ? 
N1 C9 H9A 124.4 . . ? 
N2 C9 H9A 124.4 . . ? 
C7 C6 N1 110.1(2) . . ? 
C7 C6 H6A 124.9 . . ? 
N1 C6 H6A 124.9 . . ? 
C5 C4 C3 120.9(3) . . ? 
C5 C4 H4A 119.6 . . ? 
C3 C4 H4A 119.6 . . ? 
C5 C5 C4 120.0(2) 2_655 . ? 
C5 C5 H5A 120.0 2_655 . ? 
C4 C5 H5A 120.0 . . ? 
C6 C7 N2 106.22(19) . . ? 
C6 C7 H7A 126.9 . . ? 
N2 C7 H7A 126.9 . . ? 
 
_diffrn_measured_fraction_theta_max    0.998 
_diffrn_reflns_theta_full              27.48 
_diffrn_measured_fraction_theta_full   0.998 
_refine_diff_density_max    0.485 
_refine_diff_density_min   -0.282 
_refine_diff_density_rms    0.056 
